# Supplementary material
Source: publisher figshare collection journal article supplement (https://acs.figshare.com/ndownloader/files/4413052)
Supplement: Supplementary file 1 [file 4413052]

Supporting Information Figures

The N-Glycome of Human Plasma

Katherine A. Stumpo and Vernon N. Reinhold\*

\*The Glycomics Center, Department of Molecular, Cellular, and Biomedical Sciences, University of New Hampshire, 35 Colovos Road, Durham, New Hampshire 03824.

Figure S1. (A) MS<sup>2</sup> positive ion ESI-ion trap mass spectrum of *m/z* 1279.6 (H6N5F1A3). Peaks labeled in the spectrum are not specific to any 1 isomer. Unlabelled peaks which are isomer specific are detailed in (B).

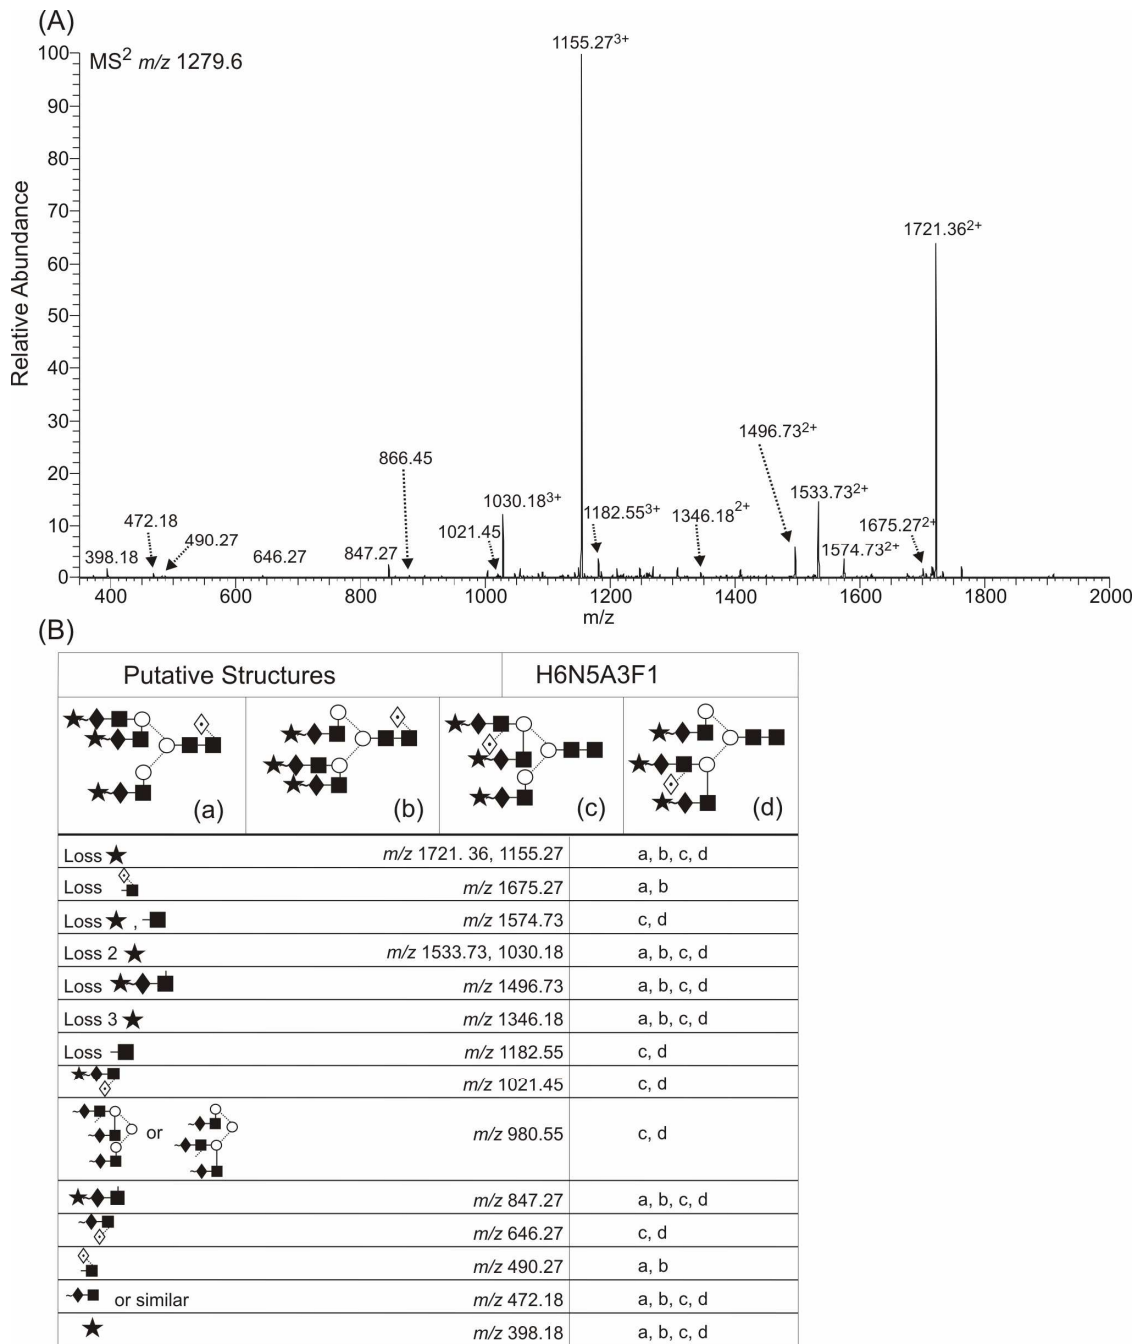

Figure S2. MS<sup>2</sup> positive ion ESI-ion trap mass spectrum of  $m/z$  1502.8 with putative structures. Dotted lines from sialic acid signifies that linkage could be to the 3- or 6-position.

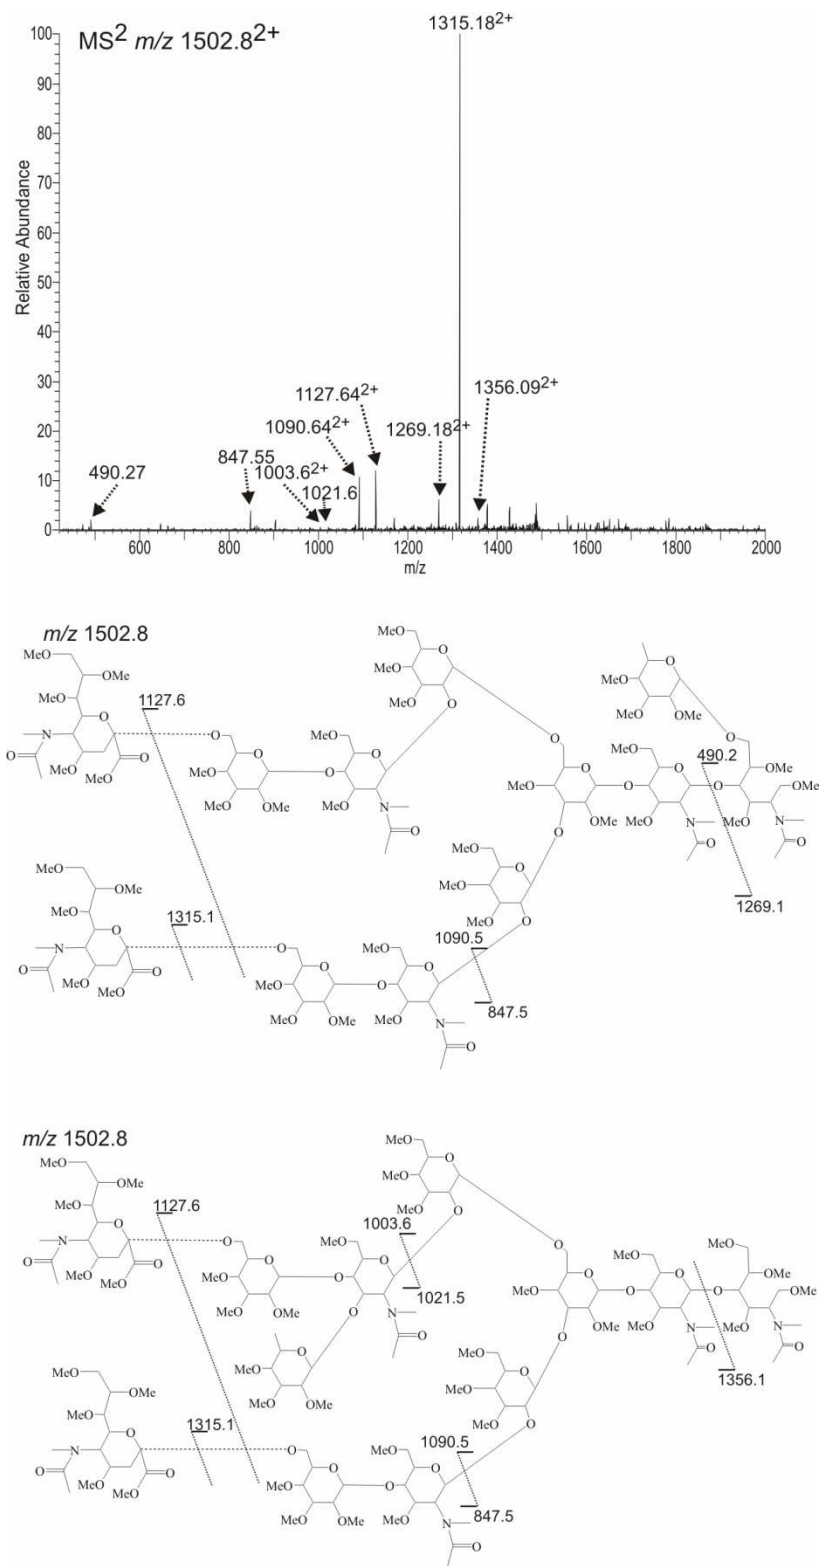

Figure S3. (A) MS<sup>3</sup> positive ion ESI-ion trap mass spectrum of  $m/z$  1009.5  $\rightarrow$  1315.73. Peaks labeled in the spectrum are possible in both isomers. (B) Detailed isomer characterization.

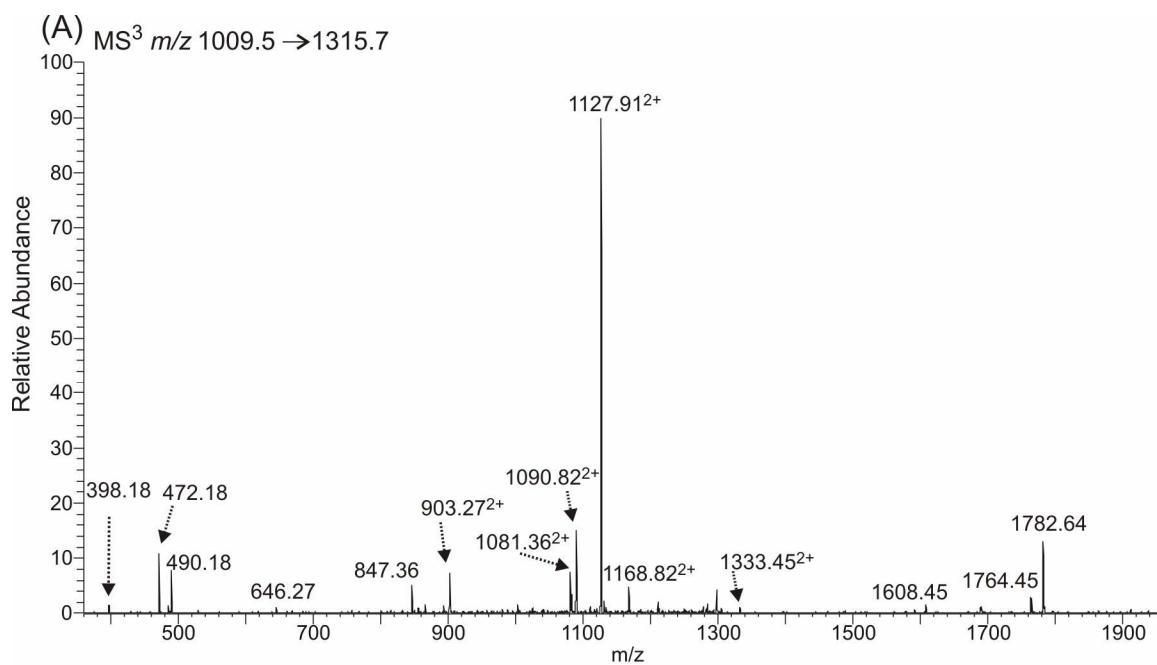

(B)

| Putative Structures                                                                                             | H5N4A2F1                                                                            |
|-----------------------------------------------------------------------------------------------------------------|-------------------------------------------------------------------------------------|
| 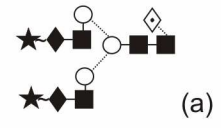                             |  |
| MS <sup>n</sup> pathways                                                                                        | Isomer                                                                              |
| 1009.5 $\rightarrow$ 1315.7 (loss $\star$ ) $\rightarrow$ 490.7 ( $\diamond$ )                                  | a                                                                                   |
| 1009.5 $\rightarrow$ 1315.7 (loss $\star$ ) $\rightarrow$ 1081.36 (loss $\star$ , $\diamond$ )                  | a                                                                                   |
| 1009.5 $\rightarrow$ 1315.7 (loss $\star$ ) $\rightarrow$ 1764.45 (loss $\star$ , $\diamond$ )                  | a                                                                                   |
| 1009.5 $\rightarrow$ 1315.7 (loss $\star$ ) $\rightarrow$ 1333.45 (loss $\star$ , $\diamond$ , $\blacksquare$ ) | a                                                                                   |
| 1009.5 $\rightarrow$ 1315.7 (loss $\star$ ) $\rightarrow$ 646.27 ( $\diamond$ )                                 | b                                                                                   |
| 1009.5 $\rightarrow$ 1315.7 (loss $\star$ ) $\rightarrow$ 1168.82 (loss $\blacksquare$ )                        | b                                                                                   |
| 1009.5 $\rightarrow$ 1315.7 (loss $\star$ ) $\rightarrow$ 1608.45 (loss $\star$ , $\diamond$ )                  | b                                                                                   |
| 1009.5 $\rightarrow$ 1315.7 (loss $\star$ ) $\rightarrow$ 1127.91 (loss $\star$ )                               | a, b                                                                                |
| 1009.5 $\rightarrow$ 1315.7 (loss $\star$ ) $\rightarrow$ 1090.82 (loss $\diamond$ , $\blacksquare$ )           | a, b                                                                                |
| 1009.5 $\rightarrow$ 1315.7 (loss $\star$ ) $\rightarrow$ 903.27 (loss $\star$ , $\diamond$ , $\blacksquare$ )  | a, b                                                                                |
| 1009.5 $\rightarrow$ 1315.7 (loss $\star$ ) $\rightarrow$ 1782.64 (loss $\star$ , $\diamond$ , $\blacksquare$ ) | a, b                                                                                |
| 1009.5 $\rightarrow$ 1315.7 (loss $\star$ ) $\rightarrow$ 847.36 ( $\star$ , $\diamond$ , $\blacksquare$ )      | a, b                                                                                |
| 1009.5 $\rightarrow$ 1315.7 (loss $\star$ ) $\rightarrow$ 472.18 ( $\diamond$ , $\blacksquare$ or other )       | a, b                                                                                |
| 1009.5 $\rightarrow$ 1315.7 (loss $\star$ ) $\rightarrow$ 398.18 ( $\star$ )                                    | a, b                                                                                |

Figure S4. MS<sup>3</sup> positive ion ESI-ion trap mass spectrum of  $m/z$  1009.5  $\rightarrow$  1040.

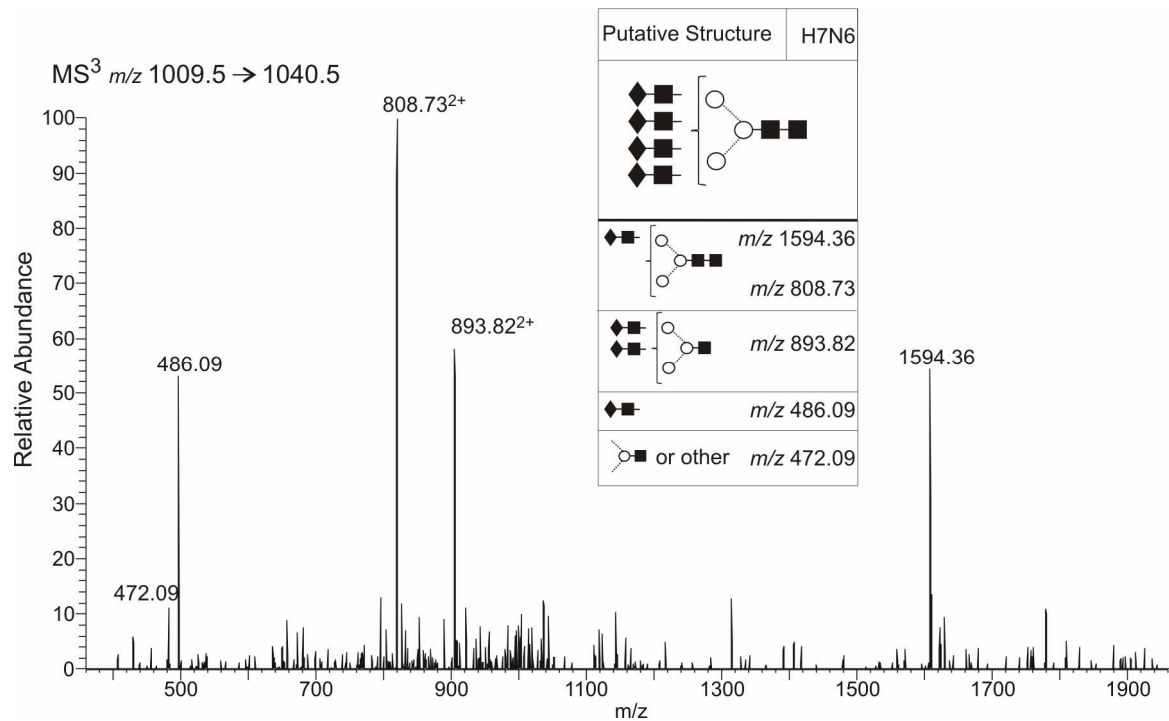

Figure S5. Positive ion ESI ion trap mass spectra of IgG depleted human plasma sample. Samples were all prepared separately on different days and have good reproducibility.

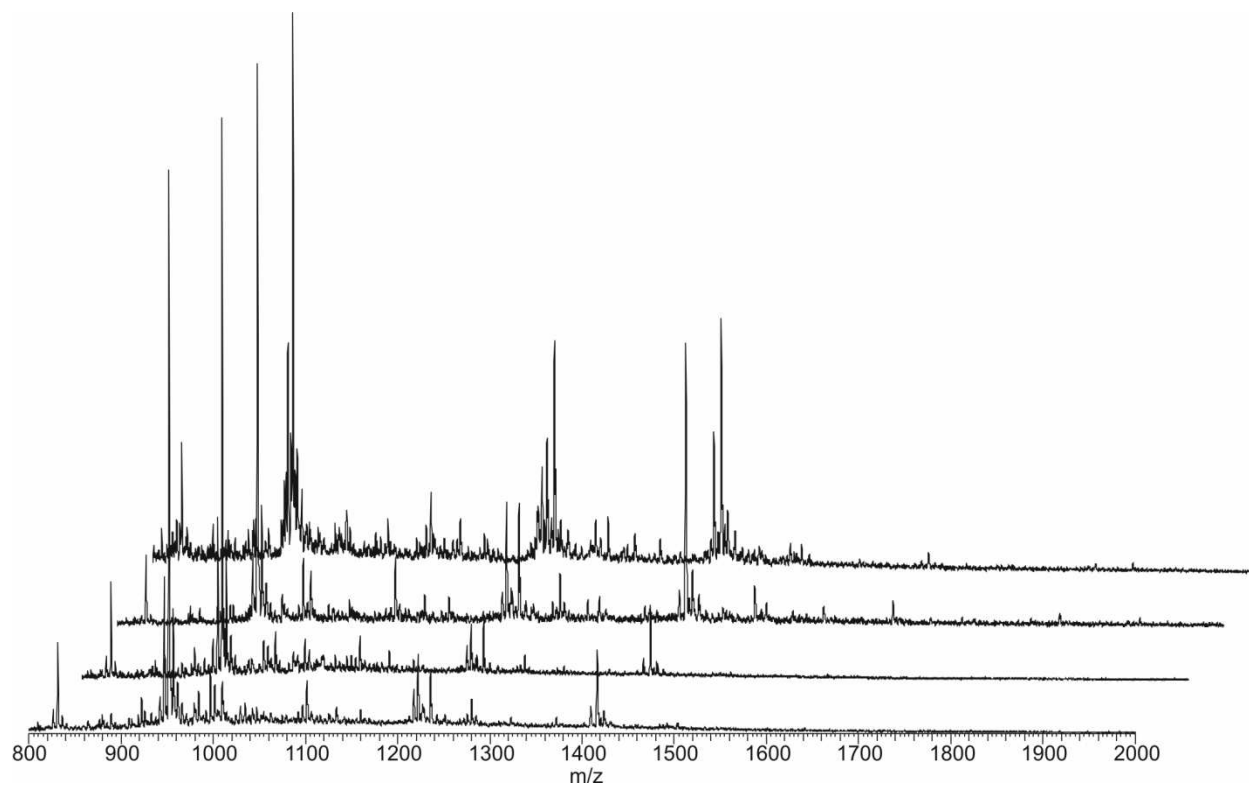

Table S1. Comparative relative abundances for 14 ions, from the spectra shown in Fig. S5.

| <i>m/z</i> | Rel.<br>Abund. | Rel.<br>Abund. | Rel.<br>Abund. | Rel.<br>Abund. |
|------------|----------------|----------------|----------------|----------------|
| 831.45     | 17             | 11             | 12             | 21             |
| 951.91     | 100            | 100            | 100            | 100            |
| 956.91     | 22             | 22             | 22             | 19             |
| 1001.82    | 7              | 9              | 13             | 7              |
| 1009.91    | 9              | 9              | 10             | 11             |
| 1101.64    | 8              | 12             | 14             | 14             |
| 1133.64    | 6              | 6              | 8              | 10             |
| 1222.00    | 10             | 21             | 24             | 19             |
| 1235.64    | 11             | 23             | 24             | 53             |
| 1280.00    | 5              | 9              | 10             | 9              |
| 1322.64    | 3              | 5              | 4              | 9              |
| 1416.18    | 13             | 51             | 52             | 56             |
| 1491.09    | 3              | 6              | 8              | 6              |
| 1640.82    | 1              | 4              | 6              | 5              |
